# Supplementary material for: Adapting obstetric and neonatal services during the COVID-19 pandemic: a scoping review
Source: Springer Nature journal article supplement (doi:10.1186/s12884-022-04409-4), 2022-02-11
Supplement: MOESM1 [file 20126062]

Supplement 1: Prisma Scoping Review Checklist

Supplement 2: Search Strategy

Supplement 3: List of Data Items

Supplement 4: Prisma Flow chart

Supplement 5: Ambulatory Visit of a Confirmed or Suspected Case of COVID-19

Supplement 6: COVID-19 Antenatal Care Clinic

Supplement 7: Low-Risk Inclusion Criteria for Early Discharge, less than 24 hours after birth

## Preferred Reporting Items for Systematic reviews and Meta-Analyses extension for Scoping Reviews (PRISMA-ScR) Checklist

| SECTION                                               | ITEM | PRISMA-ScR CHECKLIST ITEM                                                                                                                                                                                                                                                                                  | REPORTED ON PAGE # |
|-------------------------------------------------------|------|------------------------------------------------------------------------------------------------------------------------------------------------------------------------------------------------------------------------------------------------------------------------------------------------------------|--------------------|
| <b>TITLE</b>                                          |      |                                                                                                                                                                                                                                                                                                            |                    |
| Title                                                 | 1    | Identify the report as a scoping review.                                                                                                                                                                                                                                                                   |                    |
| <b>ABSTRACT</b>                                       |      |                                                                                                                                                                                                                                                                                                            |                    |
| Structured summary                                    | 2    | Provide a structured summary that includes (as applicable): background, objectives, eligibility criteria, sources of evidence, charting methods, results, and conclusions that relate to the review questions and objectives.                                                                              |                    |
| <b>INTRODUCTION</b>                                   |      |                                                                                                                                                                                                                                                                                                            |                    |
| Rationale                                             | 3    | Describe the rationale for the review in the context of what is already known. Explain why the review questions/objectives lend themselves to a scoping review approach.                                                                                                                                   |                    |
| Objectives                                            | 4    | Provide an explicit statement of the questions and objectives being addressed with reference to their key elements (e.g., population or participants, concepts, and context) or other relevant key elements used to conceptualize the review questions and/or objectives.                                  |                    |
| <b>METHODS</b>                                        |      |                                                                                                                                                                                                                                                                                                            |                    |
| Protocol and registration                             | 5    | Indicate whether a review protocol exists; state if and where it can be accessed (e.g., a Web address); and if available, provide registration information, including the registration number.                                                                                                             |                    |
| Eligibility criteria                                  | 6    | Specify characteristics of the sources of evidence used as eligibility criteria (e.g., years considered, language, and publication status), and provide a rationale.                                                                                                                                       |                    |
| Information sources*                                  | 7    | Describe all information sources in the search (e.g., databases with dates of coverage and contact with authors to identify additional sources), as well as the date the most recent search was executed.                                                                                                  |                    |
| Search                                                | 8    | Present the full electronic search strategy for at least 1 database, including any limits used, such that it could be repeated.                                                                                                                                                                            |                    |
| Selection of sources of evidence†                     | 9    | State the process for selecting sources of evidence (i.e., screening and eligibility) included in the scoping review.                                                                                                                                                                                      |                    |
| Data charting process‡                                | 10   | Describe the methods of charting data from the included sources of evidence (e.g., calibrated forms or forms that have been tested by the team before their use, and whether data charting was done independently or in duplicate) and any processes for obtaining and confirming data from investigators. |                    |
| Data items                                            | 11   | List and define all variables for which data were sought and any assumptions and simplifications made.                                                                                                                                                                                                     |                    |
| Critical appraisal of individual sources of evidence§ | 12   | If done, provide a rationale for conducting a critical appraisal of included sources of evidence; describe the methods used and how this information was used in any data synthesis (if appropriate).                                                                                                      |                    |
| Synthesis of results                                  | 13   | Describe the methods of handling and summarizing the data that were charted.                                                                                                                                                                                                                               |                    |

| SECTION                                       | ITEM | PRISMA-ScR CHECKLIST ITEM                                                                                                                                                                       | REPORTED ON PAGE # |
|-----------------------------------------------|------|-------------------------------------------------------------------------------------------------------------------------------------------------------------------------------------------------|--------------------|
| <b>RESULTS</b>                                |      |                                                                                                                                                                                                 |                    |
| Selection of sources of evidence              | 14   | Give numbers of sources of evidence screened, assessed for eligibility, and included in the review, with reasons for exclusions at each stage, ideally using a flow diagram.                    |                    |
| Characteristics of sources of evidence        | 15   | For each source of evidence, present characteristics for which data were charted and provide the citations.                                                                                     |                    |
| Critical appraisal within sources of evidence | 16   | If done, present data on critical appraisal of included sources of evidence (see item 12).                                                                                                      |                    |
| Results of individual sources of evidence     | 17   | For each included source of evidence, present the relevant data that were charted that relate to the review questions and objectives.                                                           |                    |
| Synthesis of results                          | 18   | Summarize and/or present the charting results as they relate to the review questions and objectives.                                                                                            |                    |
| <b>DISCUSSION</b>                             |      |                                                                                                                                                                                                 |                    |
| Summary of evidence                           | 19   | Summarize the main results (including an overview of concepts, themes, and types of evidence available), link to the review questions and objectives, and consider the relevance to key groups. |                    |
| Limitations                                   | 20   | Discuss the limitations of the scoping review process.                                                                                                                                          |                    |
| Conclusions                                   | 21   | Provide a general interpretation of the results with respect to the review questions and objectives, as well as potential implications and/or next steps.                                       |                    |
| <b>FUNDING</b>                                |      |                                                                                                                                                                                                 |                    |
| Funding                                       | 22   | Describe sources of funding for the included sources of evidence, as well as sources of funding for the scoping review. Describe the role of the funders of the scoping review.                 |                    |

JBI = Joanna Briggs Institute; PRISMA-ScR = Preferred Reporting Items for Systematic reviews and Meta-Analyses extension for Scoping Reviews.

\* Where *sources of evidence* (see second footnote) are compiled from, such as bibliographic databases, social media platforms, and Web sites.

† A more inclusive/heterogeneous term used to account for the different types of evidence or data sources (e.g., quantitative and/or qualitative research, expert opinion, and policy documents) that may be eligible in a scoping review as opposed to only studies. This is not to be confused with *information sources* (see first footnote).

‡ The frameworks by Arksey and O'Malley (6) and Levac and colleagues (7) and the JBI guidance (4, 5) refer to the process of data extraction in a scoping review as data charting.

§ The process of systematically examining research evidence to assess its validity, results, and relevance before using it to inform a decision. This term is used for items 12 and 19 instead of "risk of bias" (which is more applicable to systematic reviews of interventions) to include and acknowledge the various sources of evidence that may be used in a scoping review (e.g., quantitative and/or qualitative research, expert opinion, and policy document).

From: Tricco AC, Lillie E, Zarin W, O'Brien KK, Colquhoun H, Levac D, et al. PRISMA Extension for Scoping Reviews (PRISMA-ScR): Checklist and Explanation. *Ann Intern Med.* ;169:467–473. doi: 10.7326/M18-0850

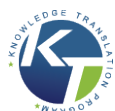

## MAY 15, 2020 SEARCH RUN

Medline Final Search:

Database(s): Ovid MEDLINE(R) ALL 1946 to May 14, 2020

Search Strategy:

| #  | Searches                                                                                                                                                                                                                                                                                                                                                                                                                                                                                                                                                                                                                                                                                                                                | Results |
|----|-----------------------------------------------------------------------------------------------------------------------------------------------------------------------------------------------------------------------------------------------------------------------------------------------------------------------------------------------------------------------------------------------------------------------------------------------------------------------------------------------------------------------------------------------------------------------------------------------------------------------------------------------------------------------------------------------------------------------------------------|---------|
| 1  | exp Coronavirus/                                                                                                                                                                                                                                                                                                                                                                                                                                                                                                                                                                                                                                                                                                                        | 13719   |
| 2  | exp Coronavirus Infections/                                                                                                                                                                                                                                                                                                                                                                                                                                                                                                                                                                                                                                                                                                             | 12380   |
| 3  | (coronavirus* or corona virus* or corona virinae* or coronavirinae* or OC43 or NL63 or 229E or HKU1 or HCoV* or covid* or ncov* or coV or sars-cov* or sarscov* or Sars-coronavirus* or Severe Acute Respiratory Syndrome Coronavirus* or 2019-ncov or 2019-novel CoV or SARS-like coronavirus*).mp.                                                                                                                                                                                                                                                                                                                                                                                                                                    | 28676   |
| 4  | ((novel or new or nouveau) adj2 pandemi*2).mp.                                                                                                                                                                                                                                                                                                                                                                                                                                                                                                                                                                                                                                                                                          | 904     |
| 5  | ((pneumonia or sars*).mp. or exp pneumonia/) and Wuhan.mp.                                                                                                                                                                                                                                                                                                                                                                                                                                                                                                                                                                                                                                                                              | 949     |
| 6  | (COVID-19 or severe acute respiratory syndrome coronavirus 2).os,ps,rs,ox,px,rx,nm.                                                                                                                                                                                                                                                                                                                                                                                                                                                                                                                                                                                                                                                     | 2888    |
| 7  | or/1-6                                                                                                                                                                                                                                                                                                                                                                                                                                                                                                                                                                                                                                                                                                                                  | 34565   |
| 8  | exp Pregnancy/                                                                                                                                                                                                                                                                                                                                                                                                                                                                                                                                                                                                                                                                                                                          | 888385  |
| 9  | exp Pregnancy Complications/                                                                                                                                                                                                                                                                                                                                                                                                                                                                                                                                                                                                                                                                                                            | 423032  |
| 10 | exp Pregnancy Outcome/                                                                                                                                                                                                                                                                                                                                                                                                                                                                                                                                                                                                                                                                                                                  | 73132   |
| 11 | exp Obstetrics/                                                                                                                                                                                                                                                                                                                                                                                                                                                                                                                                                                                                                                                                                                                         | 22538   |
| 12 | exp Breast Feeding/                                                                                                                                                                                                                                                                                                                                                                                                                                                                                                                                                                                                                                                                                                                     | 37387   |
| 13 | exp Maternal Health Services/                                                                                                                                                                                                                                                                                                                                                                                                                                                                                                                                                                                                                                                                                                           | 48885   |
| 14 | exp Fetus/                                                                                                                                                                                                                                                                                                                                                                                                                                                                                                                                                                                                                                                                                                                              | 156690  |
| 15 | exp Fetal Therapies/                                                                                                                                                                                                                                                                                                                                                                                                                                                                                                                                                                                                                                                                                                                    | 3990    |
| 16 | exp Fetal Monitoring/                                                                                                                                                                                                                                                                                                                                                                                                                                                                                                                                                                                                                                                                                                                   | 8646    |
| 17 | exp Prenatal Diagnosis/                                                                                                                                                                                                                                                                                                                                                                                                                                                                                                                                                                                                                                                                                                                 | 73597   |
| 18 | exp Infant, Newborn/                                                                                                                                                                                                                                                                                                                                                                                                                                                                                                                                                                                                                                                                                                                    | 603439  |
| 19 | Pregnant Women/                                                                                                                                                                                                                                                                                                                                                                                                                                                                                                                                                                                                                                                                                                                         | 8156    |
| 20 | Infectious Disease Transmission, Vertical/                                                                                                                                                                                                                                                                                                                                                                                                                                                                                                                                                                                                                                                                                              | 15756   |
| 21 | Intensive Care Units, Neonatal/                                                                                                                                                                                                                                                                                                                                                                                                                                                                                                                                                                                                                                                                                                         | 14541   |
| 22 | Intensive Care, Neonatal/                                                                                                                                                                                                                                                                                                                                                                                                                                                                                                                                                                                                                                                                                                               | 5628    |
| 23 | (pregnan* or gestation* or parturition or neonatal* or neo natal* or neonate* or ante natal* or antenatal* or pre natal* or prenatal* or puerper* or postnatal* or postpartum or post partum or post natal* or peripartum or peri partum or intrapartum or intra partum or prepregnancy or pre pregnancy or preconception* or pre conception* or periconception* or peri conception* or preterm or premature or labo?r or eclamp* or preeclamp* or pre eclamp* or amniocentes* or chorion* vill* or breastfe* or breast fe* or lactation* or cesarean or caesarean or cesarian or caesarian or cesarien or caesarien or newborn* or new born* or tocoly* or fetal or foetal or fetus or foetus or miscarriage* or obstetric*).tw,kf,kw. | 1430942 |

Supplementary Data 3: Data Items

|                                                                                                                                          |
|------------------------------------------------------------------------------------------------------------------------------------------|
| Study Reference Identification Number                                                                                                    |
| Author                                                                                                                                   |
| Journal                                                                                                                                  |
| Area covered (obstetrics, Maternal-fetal medicine, neonatology, fetal therapy etc.)                                                      |
| Changes to Low-risk antenatal clinics                                                                                                    |
| Changes to High risk antenatal clinics (maternal/ Fetal/ Genetics/ ultrasound/ allied specialties)                                       |
| Changes to Outpatient ambulatory care – day assessment units                                                                             |
| Changes to Obstetric Triage                                                                                                              |
| Changes to Postnatal ambulatory care or equivalent                                                                                       |
| Changes to Early pregnancy clinic                                                                                                        |
| Changes to Screening and testing for COVID-19 in all areas                                                                               |
| Changes to inpatient management - Antenatal ward                                                                                         |
| Changes to labour and childbirth (labour induction, elective and emergency caesareans, analgesia, those presenting in spontaneous labour |
| COVID-team                                                                                                                               |
| Changes to Fetal therapy                                                                                                                 |
| Changes to Postpartum (including ward care, early discharge, group classes etc)                                                          |
| Changes to Neonatal Intensive Care Unit Policies                                                                                         |
| Changes to Obstetric nursing                                                                                                             |
| Changes to Perinatal mental health                                                                                                       |
| Changes to Trainee schedules                                                                                                             |
| Training of staff / PPE                                                                                                                  |
| Wellness initiatives                                                                                                                     |
| Anything specific with regard to clinical care - algorithms etc.                                                                         |
| Other changes                                                                                                                            |
| Staff Restructuring                                                                                                                      |
| Visitor policies in various areas                                                                                                        |

|    |                                                                                                                                                                                            |         |
|----|--------------------------------------------------------------------------------------------------------------------------------------------------------------------------------------------|---------|
| 24 | ((Vertical or Fetomaternal or Foetomaternal or Maternal-Fetal or Maternal Fetal or Maternal-Foetal or Maternal Foetal or Mother-To-Child or Mother to child) adj2 transmission*).tw,kf,kw. | 12161   |
| 25 | or/8-24                                                                                                                                                                                    | 1976064 |
| 26 | 7 and 25                                                                                                                                                                                   | 1666    |
| 27 | 26 and 20191101:20301231.(dt). [Create Date starting from November 2019]                                                                                                                   | 474     |

Embase Translated Search:

Database(s): **Embase Classic+Embase** 1947 to 2020 May 14

Search Strategy:

| #  | Searches                                                                                                                                                                                                                                                                                                                                                                                                                                                                                                                                                                                                                                                                                                                             | Results |
|----|--------------------------------------------------------------------------------------------------------------------------------------------------------------------------------------------------------------------------------------------------------------------------------------------------------------------------------------------------------------------------------------------------------------------------------------------------------------------------------------------------------------------------------------------------------------------------------------------------------------------------------------------------------------------------------------------------------------------------------------|---------|
| 1  | exp Coronavirinae/                                                                                                                                                                                                                                                                                                                                                                                                                                                                                                                                                                                                                                                                                                                   | 14271   |
| 2  | exp Coronavirus infection/                                                                                                                                                                                                                                                                                                                                                                                                                                                                                                                                                                                                                                                                                                           | 13034   |
| 3  | (coronavirus* or corona virus* or corona virinae* or coronavirinae* or OC43 or NL63 or 229E or HKU1 or HCoV* or covid* or ncov* or coV or sars-cov* or sarscov* or Sars-coronavirus* or Severe Acute Respiratory Syndrome Coronavirus* or Severe Acute Respiratory Syndrome Corona virus* or 2019-ncov or 2019-novel CoV or SARS-like coronavirus*).mp.                                                                                                                                                                                                                                                                                                                                                                              | 37521   |
| 4  | ((novel or new or nouveau) adj2 pandemi*2).mp.                                                                                                                                                                                                                                                                                                                                                                                                                                                                                                                                                                                                                                                                                       | 1055    |
| 5  | ((pneumonia or sars*).mp. or exp pneumonia/) and Wuhan.mp.                                                                                                                                                                                                                                                                                                                                                                                                                                                                                                                                                                                                                                                                           | 844     |
| 6  | or/1-5                                                                                                                                                                                                                                                                                                                                                                                                                                                                                                                                                                                                                                                                                                                               | 45280   |
| 7  | exp Pregnancy/                                                                                                                                                                                                                                                                                                                                                                                                                                                                                                                                                                                                                                                                                                                       | 798660  |
| 8  | exp Pregnancy Disorder/                                                                                                                                                                                                                                                                                                                                                                                                                                                                                                                                                                                                                                                                                                              | 613094  |
| 9  | exp Obstetric Procedure/                                                                                                                                                                                                                                                                                                                                                                                                                                                                                                                                                                                                                                                                                                             | 481868  |
| 10 | pregnancy outcome/                                                                                                                                                                                                                                                                                                                                                                                                                                                                                                                                                                                                                                                                                                                   | 58650   |
| 11 | exp Breast Feeding/                                                                                                                                                                                                                                                                                                                                                                                                                                                                                                                                                                                                                                                                                                                  | 54464   |
| 12 | maternal health service/                                                                                                                                                                                                                                                                                                                                                                                                                                                                                                                                                                                                                                                                                                             | 1498    |
| 13 | fetus/                                                                                                                                                                                                                                                                                                                                                                                                                                                                                                                                                                                                                                                                                                                               | 213728  |
| 14 | fetal therapy/                                                                                                                                                                                                                                                                                                                                                                                                                                                                                                                                                                                                                                                                                                                       | 620     |
| 15 | exp fetus monitoring/                                                                                                                                                                                                                                                                                                                                                                                                                                                                                                                                                                                                                                                                                                                | 14672   |
| 16 | exp prenatal diagnosis/                                                                                                                                                                                                                                                                                                                                                                                                                                                                                                                                                                                                                                                                                                              | 110132  |
| 17 | newborn/                                                                                                                                                                                                                                                                                                                                                                                                                                                                                                                                                                                                                                                                                                                             | 614813  |
| 18 | pregnant woman/                                                                                                                                                                                                                                                                                                                                                                                                                                                                                                                                                                                                                                                                                                                      | 84823   |
| 19 | neonatal intensive care unit/                                                                                                                                                                                                                                                                                                                                                                                                                                                                                                                                                                                                                                                                                                        | 9709    |
| 20 | newborn intensive care/                                                                                                                                                                                                                                                                                                                                                                                                                                                                                                                                                                                                                                                                                                              | 26404   |
| 21 | vertical transmission/                                                                                                                                                                                                                                                                                                                                                                                                                                                                                                                                                                                                                                                                                                               | 14787   |
| 22 | (pregnan* or gestation* or parturition or neonatal* or neo natal* or neonate* or ante natal* or antenatal* or pre natal* or prenatal* or puerper* or postnatal* or postpartum or post partum or post natal* or peripartum or peri partum or intrapartum or intra partum or prepregnancy or pre pregnancy or preconception* or pre conception* or periconception* or peri conception* or preterm or premature or labo?r or eclamp* or preeclamp* or pre eclamp* or amniocentes* or chorion* vill* or breastfe* or breast fe* or lactation* or cesarean or caesarean or cesarian or caesarian or cesarien or caesarien or newborn* or new born* or tocoly* or fetal or foetal or fetus or foetus or miscarriage* or obstetric*).tw,kw. | 1886202 |

|    |                                                                                                                                                                                         |         |
|----|-----------------------------------------------------------------------------------------------------------------------------------------------------------------------------------------|---------|
| 23 | ((Vertical or Fetomaternal or Foetomaternal or Maternal-Fetal or Maternal Fetal or Maternal-Foetal or Maternal Foetal or Mother-To-Child or Mother to child) adj2 transmission*).tw,kw. | 15286   |
| 24 | or/7-23                                                                                                                                                                                 | 2435123 |
| 25 | 6 and 24                                                                                                                                                                                | 2220    |
| 26 | limit 25 to dc=20191101-20301231                                                                                                                                                        | 467     |

---

Cochrane Translated Search:

Search Name: Covid19Pregnancy\_RD\_Cochrane\_Final

Date Run: 15/05/2020 23:14:58

Comment: Limit Nov 2019 - Dec 2020

| ID  | Search                                                                                                                                                                                                                                                                                           | Hits           |
|-----|--------------------------------------------------------------------------------------------------------------------------------------------------------------------------------------------------------------------------------------------------------------------------------------------------|----------------|
| #1  | MeSH descriptor: [Coronavirus] explode all trees                                                                                                                                                                                                                                                 | <b>(13)</b>    |
| #2  | MeSH descriptor: [Coronavirus Infections] explode all trees                                                                                                                                                                                                                                      | <b>(131)</b>   |
| #3  | (coronavirus* or corona virus* or corona virinae* or coronavirinae* or OC43 or NL63 or 229E or HKU1 or HCoV* or covid* or ncov* or coV or sars-cov* or sarscov* or Sars-coronavirus* or Severe Acute Respiratory Syndrome Coronavirus* or 2019*ncov or 2019*novel CoV or SARS-like coronavirus*) | <b>(1167)</b>  |
| #4  | ((novel or new or nouveau) NEAR/2 pandemi*)                                                                                                                                                                                                                                                      | <b>(19)</b>    |
| #5  | (pneumonia or sars*)                                                                                                                                                                                                                                                                             | <b>(15874)</b> |
| #6  | MeSH descriptor: [Pneumonia] explode all trees                                                                                                                                                                                                                                                   | <b>(3504)</b>  |
| #7  | (Wuhan)                                                                                                                                                                                                                                                                                          | <b>(1078)</b>  |
| #8  | (#5 OR #6) AND #7                                                                                                                                                                                                                                                                                | <b>(63)</b>    |
| #9  | {OR #1-#4} OR #8                                                                                                                                                                                                                                                                                 | <b>(1208)</b>  |
| #10 | MeSH descriptor: [Pregnancy] explode all trees                                                                                                                                                                                                                                                   | <b>(8451)</b>  |
| #11 | MeSH descriptor: [Pregnancy Complications] explode all trees                                                                                                                                                                                                                                     | <b>(11459)</b> |
| #12 | MeSH descriptor: [Pregnancy Outcome] explode all trees                                                                                                                                                                                                                                           | <b>(3551)</b>  |
| #13 | MeSH descriptor: [Obstetrics] explode all trees                                                                                                                                                                                                                                                  | <b>(178)</b>   |
| #14 | MeSH descriptor: [Breast Feeding] explode all trees                                                                                                                                                                                                                                              | <b>(1798)</b>  |
| #15 | MeSH descriptor: [Maternal Health Services] explode all trees                                                                                                                                                                                                                                    | <b>(2152)</b>  |

- #16 MeSH descriptor: [Fetus] explode all trees (1733)
- #17 MeSH descriptor: [Fetal Therapies] explode all trees (37)
- #18 MeSH descriptor: [Fetal Monitoring] explode all trees (360)
- #19 MeSH descriptor: [Prenatal Diagnosis] explode all trees (803)
- #20 MeSH descriptor: [Infant, Newborn] explode all trees (15549)
- #21 MeSH descriptor: [Pregnant Women] this term only (245)
- #22 MeSH descriptor: [Infectious Disease Transmission, Vertical] this term only (529)
- #23 MeSH descriptor: [Intensive Care Units, Neonatal] this term only (712)
- #24 MeSH descriptor: [Intensive Care, Neonatal] this term only (324)
- #25 (pregnan\* or gestation\* or parturition or neonatal\* or neo natal\* or neonate\* or ante natal\* or antenatal\* or pre natal\* or prenatal\* or puerper\* or postnatal\* or postpartum or post partum or post natal\* or peripartum or peri partum or intrapartum or intra partum or prepregnancy or pre pregnancy or preconception\* or pre conception\* or periconception\* or peri conception\* or preterm or premature or labo?r or eclamp\* or preeclamp\* or pre eclamp\* or amniocentes\* or chorion\* vill\* or breastfe\* or breast fe\* or lactation\* or cesarean or caesarean or cesarian or caesarian or cesarien or caesarien or newborn\* or new born\* or tocoly\* or fetal or foetal or fetus or foetus or miscarriage\* or obstetric\*):ti,ab,kw (137436)
- #26 (((Vertical or Fetomaternal or Foetomaternal or Maternal-Fetal or Maternal Fetal or Maternal-Foetal or Maternal Foetal or Mother-To-Child or Mother to child) NEAR/2 (transmission\*))) :ti,ab,kw (1994)
- #27 {OR #10-#26} (138630)
- #28 #9 AND #27 (150)
- #29 #9 AND #27 with Cochrane Library publication date Between Nov 2019 and Dec 2020 (66)

Cochrane Database of Systematic Reviews: (13) -Exported

Cochrane Protocols: (2) – Exported (But because protocols are NOT published journal articles, they will not be included in the Systematic Review. Below is a screenshot of the 2 Protocols)



|                        |                                |              |                 |                          |                       |               |
|------------------------|--------------------------------|--------------|-----------------|--------------------------|-----------------------|---------------|
| Cochrane Reviews<br>13 | <b>Cochrane Protocols</b><br>2 | Trials<br>50 | Editorials<br>0 | Special collections<br>1 | Clinical Answers<br>0 | Other Reviews |
|------------------------|--------------------------------|--------------|-----------------|--------------------------|-----------------------|---------------|

**2 Cochrane Protocols matching "#29 - #9 AND #27" with Cochrane Library publication date Between Nov 2019 and Dec 2020**

**Cochrane Database of Systematic Reviews**  
Issue 5 of 12, May 2020

**Select all (2)**    Export selected citation(s)    **Hide all previews**

Order by     Results per page

- Antidepressant treatment for postnatal depression**

Jennifer Valeska Elli Brown, Claire A Wilson, Karyn Ayre, Emily South, Emma Molyneaux, Kylee Trevillion, Louise M Howard, Hind Khalifeh

Intervention Protocol 20 March 2020 Free access

**Hide preview**

**Abstract**

This is a protocol for a Cochrane Review (Intervention). The objectives are as follows: To assess the effectiveness and safety of antidepressant drugs in comparison with any other treatment (psychological, psychosocial, or pharmacological), placebo, or treatment as usual for PND.
- High- versus low-dose conventional phototherapy for neonatal jaundice**

Yao Mun Choo, Shelley Springer, Ke Xin Yip, Azanna Ahmad Kamar, Eng Hwa Wong, Shaun Wen Huey Lee, Nai Ming Lai

Intervention Protocol 30 April 2020 Major change Free access

**Hide preview**

**Abstract - Objectives**

This is a protocol for a Cochrane Review (intervention). The objectives are as follows: To assess the effects of high-dose conventional phototherapy versus low-dose conventional phototherapy on bilirubin level and associated clinical outcomes that constitute the major conditions in the spectrum of...

Trials (Cochrane CENTRAL): **(50) - Exported**

Editorials: **(0)**

Special collections: **(1) – Special Collections cannot be exported & are not included in Systematic Reviews, see below for reference**

<https://www-cochranelibrary-com.myaccess.library.utoronto.ca/collections/doi/SC000043/full>

[Cochrane Reviews](#) 13 | 
 [Cochrane Protocols](#) 1 | 
 [Trials](#) 50 | 
 [Editorials](#) 0 | 
 **Special collections** 1 | 
 [More](#)

**1 Special collection matching "#29 - #9 AND #27" with Cochrane Library publication date Between Nov 2019 and Dec 2020**

[Hide all previews](#)

Order by  Results per page

1 
**Coronavirus (COVID-19): remote care through telehealth**  
[Hide preview](#) ▲ 14 May 2020

The aim of this collection is to ensure immediate access to systematic reviews most directly relevant to remote health care through telehealth. The measures adopted internationally to curb the spread of COVID-19 have led to significant changes in how health care is accessed and provided.

CINAHL Translated Search:

MY

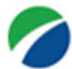

Friday, May 15, 2020 4:41:01 PM

EBSCOhost

| #   | Query      | Limiters/Expanders                                                                                                        | Last Run Via                                                                                                 | Results |
|-----|------------|---------------------------------------------------------------------------------------------------------------------------|--------------------------------------------------------------------------------------------------------------|---------|
| S26 | S6 AND S24 | Limiters - Published<br>Date: 20191101-20301231<br>Expanders - Apply equivalent subjects<br>Search modes - Boolean/Phrase | Interface - EBSCOhost<br>Research Databases<br>Search Screen - Advanced<br>Search Database - CINAHL Complete | 91      |

|     |                                                                                                                                                                                                                                                                                                                                                                                                                                                                                                                                                                            |                                                                        |                                                                                                              |         |
|-----|----------------------------------------------------------------------------------------------------------------------------------------------------------------------------------------------------------------------------------------------------------------------------------------------------------------------------------------------------------------------------------------------------------------------------------------------------------------------------------------------------------------------------------------------------------------------------|------------------------------------------------------------------------|--------------------------------------------------------------------------------------------------------------|---------|
| S25 | S6 AND S24                                                                                                                                                                                                                                                                                                                                                                                                                                                                                                                                                                 | Expanders - Apply equivalent subjects<br>Search modes - Boolean/Phrase | Interface - EBSCOhost<br>Research Databases<br>Search Screen - Advanced<br>Search Database - CINAHL Complete | 716     |
| S24 | S7 OR S8 OR S9 OR S10 OR S11 OR S12 OR S13 OR S14 OR S15 OR S16 OR S17 OR S18 OR S19 OR S20 OR S21 OR S22 OR S23                                                                                                                                                                                                                                                                                                                                                                                                                                                           | Expanders - Apply equivalent subjects<br>Search modes - Boolean/Phrase | Interface - EBSCOhost<br>Research Databases<br>Search Screen - Advanced<br>Search Database - CINAHL Complete | 499,454 |
| S23 | TI ( ((Vertical or Fetomaternal or Foetomaternal or Maternal-Fetal or Maternal Fetal or Maternal-Foetal or Maternal Foetal or Mother-To-Child or Mother to child) N1 transmission* ) ) OR AB ( ((Vertical or Fetomaternal or Foetomaternal or Maternal-Fetal or Maternal Fetal or Maternal-Foetal or Maternal Foetal or Mother-To-Child or Mother to child) N1 transmission* ) ) OR MW ( ((Vertical or Fetomaternal or Foetomaternal or Maternal-Fetal or Maternal Fetal or Maternal-Foetal or Maternal Foetal or Mother-To-Child or Mother to child) N1 transmission* ) ) | Expanders - Apply equivalent subjects<br>Search modes - Boolean/Phrase | Interface - EBSCOhost<br>Research Databases<br>Search Screen - Advanced<br>Search Database - CINAHL Complete | 7,233   |
| S22 | TI ( (pregnan* or gestation* or parturition or neonatal* or neo natal* or neonate* or ante natal* or antenatal* or pre natal* or prenatal* or puerper* or postnatal* or postpartum or post partum or post natal* or peripartum or peri partum or intrapartum or intra partum or prepregnancy or pre pregnancy or preconception* or pre conception* or periconception* or peri conception* or preterm                                                                                                                                                                       | Expanders - Apply equivalent subjects<br>Search modes - Boolean/Phrase | Interface - EBSCOhost<br>Research Databases<br>Search Screen - Advanced<br>Search Database -                 | 488,357 |

|     |                                                                                                                                                                                                                                                                                                                                                                                                                                                                                                                                                                                                                                                                                                                                                                                                                                                                                                                                                                                                                                                                                                                                                                                                                                                                                                                                                                                                                                                                                                                                                                                                                                                                                                                                                                                                                        |                                       |                                          |       |
|-----|------------------------------------------------------------------------------------------------------------------------------------------------------------------------------------------------------------------------------------------------------------------------------------------------------------------------------------------------------------------------------------------------------------------------------------------------------------------------------------------------------------------------------------------------------------------------------------------------------------------------------------------------------------------------------------------------------------------------------------------------------------------------------------------------------------------------------------------------------------------------------------------------------------------------------------------------------------------------------------------------------------------------------------------------------------------------------------------------------------------------------------------------------------------------------------------------------------------------------------------------------------------------------------------------------------------------------------------------------------------------------------------------------------------------------------------------------------------------------------------------------------------------------------------------------------------------------------------------------------------------------------------------------------------------------------------------------------------------------------------------------------------------------------------------------------------------|---------------------------------------|------------------------------------------|-------|
|     | <p>or premature or labo?r or eclamp* or preeclamp* or pre eclamp* or amniocentes* or chorion* vill* or breastfe* or breast fe* or lactation* or cesarean or caesarean or cesarian or caesarian or cesarien or caesarien or newborn* or new born* or tocoly* or fetal or foetal or fetus or foetus or miscarriage* or obstetric*) ) OR AB ( (pregnan* or gestation* or parturition or neonatal* or neo natal* or neonate* or ante natal* or antenatal* or pre natal* or prenatal* or puerper* or postnatal* or postpartum or post partum or post natal* or peripartum or peri partum or intrapartum or intra partum or prepregnancy or pre pregnancy or preconception* or pre conception* or periconception* or peri conception* or preterm or premature or labo?r or eclamp* or preeclamp* or pre eclamp* or amniocentes* or chorion* vill* or breastfe* or breast fe* or lactation* or cesarean or caesarean or cesarian or caesarian or cesarien or caesarien or newborn* or new born* or tocoly* or fetal or foetal or fetus or foetus or miscarriage* or obstetric*) ) OR MW ( (pregnan* or gestation* or parturition or neonatal* or neo natal* or neonate* or ante natal* or antenatal* or pre natal* or prenatal* or puerper* or postnatal* or postpartum or post partum or post natal* or peripartum or peri partum or intrapartum or intra partum or prepregnancy or pre pregnancy or preconception* or pre conception* or periconception* or peri conception* or preterm or premature or labo?r or eclamp* or preeclamp* or pre eclamp* or amniocentes* or chorion* vill* or breastfe* or breast fe* or lactation* or cesarean or caesarean or cesarian or caesarian or cesarien or caesarien or newborn* or new born* or tocoly* or fetal or foetal or fetus or foetus or miscarriage* or obstetric*) )</p> |                                       | CINAHL Complete                          |       |
| S21 | (MH "Intensive Care, Neonatal")                                                                                                                                                                                                                                                                                                                                                                                                                                                                                                                                                                                                                                                                                                                                                                                                                                                                                                                                                                                                                                                                                                                                                                                                                                                                                                                                                                                                                                                                                                                                                                                                                                                                                                                                                                                        | Expanders - Apply equivalent subjects | Interface - EBSCOhost Research Databases | 4,836 |

|     |                                       |                                                                              |                                                                                                                                |        |
|-----|---------------------------------------|------------------------------------------------------------------------------|--------------------------------------------------------------------------------------------------------------------------------|--------|
|     |                                       | Search modes -<br>Boolean/Phrase                                             | Search Screen<br>- Advanced<br>Search<br>Database -<br>CINAHL<br>Complete                                                      |        |
| S20 | (MH "Intensive Care Units, Neonatal") | Expanders - Apply<br>equivalent subjects<br>Search modes -<br>Boolean/Phrase | Interface -<br>EBSCOhost<br>Research<br>Databases<br>Search Screen<br>- Advanced<br>Search<br>Database -<br>CINAHL<br>Complete | 14,460 |
| S19 | (MH "Disease Transmission, Vertical") | Expanders - Apply<br>equivalent subjects<br>Search modes -<br>Boolean/Phrase | Interface -<br>EBSCOhost<br>Research<br>Databases<br>Search Screen<br>- Advanced<br>Search<br>Database -<br>CINAHL<br>Complete | 6,214  |
| S18 | (MH "Expectant Mothers")              | Expanders - Apply<br>equivalent subjects<br>Search modes -<br>Boolean/Phrase | Interface -<br>EBSCOhost<br>Research<br>Databases<br>Search Screen<br>- Advanced<br>Search<br>Database -<br>CINAHL<br>Complete | 8,244  |
| S17 | (MH "Obstetric Care+")                | Expanders - Apply<br>equivalent subjects<br>Search modes -<br>Boolean/Phrase | Interface -<br>EBSCOhost<br>Research<br>Databases                                                                              | 53,782 |

|     |                                  |                                                                              |                                                                                                                                |        |
|-----|----------------------------------|------------------------------------------------------------------------------|--------------------------------------------------------------------------------------------------------------------------------|--------|
|     |                                  |                                                                              | Search Screen<br>- Advanced<br>Search<br>Database -<br>CINAHL<br>Complete                                                      |        |
| S12 | (MH "Maternal Health Services+") | Expanders - Apply<br>equivalent subjects<br>Search modes -<br>Boolean/Phrase | Interface -<br>EBSCOhost<br>Research<br>Databases<br>Search Screen<br>- Advanced<br>Search<br>Database -<br>CINAHL<br>Complete | 32,595 |
| S11 | (MH "Breast Feeding+")           | Expanders - Apply<br>equivalent subjects<br>Search modes -<br>Boolean/Phrase | Interface -<br>EBSCOhost<br>Research<br>Databases<br>Search Screen<br>- Advanced<br>Search<br>Database -<br>CINAHL<br>Complete | 25,010 |
| S10 | (MH "Obstetrics")                | Expanders - Apply<br>equivalent subjects<br>Search modes -<br>Boolean/Phrase | Interface -<br>EBSCOhost<br>Research<br>Databases<br>Search Screen<br>- Advanced<br>Search<br>Database -<br>CINAHL<br>Complete | 6,082  |
| S9  | (MH "Pregnancy Outcomes")        | Expanders - Apply<br>equivalent subjects<br>Search modes -<br>Boolean/Phrase | Interface -<br>EBSCOhost<br>Research<br>Databases                                                                              | 24,787 |

|    |                                                                      |                                                                              |                                                                                                                                |         |
|----|----------------------------------------------------------------------|------------------------------------------------------------------------------|--------------------------------------------------------------------------------------------------------------------------------|---------|
|    |                                                                      |                                                                              | Search Screen<br>- Advanced<br>Search<br>Database -<br>CINAHL<br>Complete                                                      |         |
| S8 | (MH "Pregnancy Complications+")                                      | Expanders - Apply<br>equivalent subjects<br>Search modes -<br>Boolean/Phrase | Interface -<br>EBSCOhost<br>Research<br>Databases<br>Search Screen<br>- Advanced<br>Search<br>Database -<br>CINAHL<br>Complete | 97,903  |
| S7 | (MH "Pregnancy+")                                                    | Expanders - Apply<br>equivalent subjects<br>Search modes -<br>Boolean/Phrase | Interface -<br>EBSCOhost<br>Research<br>Databases<br>Search Screen<br>- Advanced<br>Search<br>Database -<br>CINAHL<br>Complete | 223,346 |
| S6 | S1 OR S2 OR S3 OR S4 OR S5                                           | Expanders - Apply<br>equivalent subjects<br>Search modes -<br>Boolean/Phrase | Interface -<br>EBSCOhost<br>Research<br>Databases<br>Search Screen<br>- Advanced<br>Search<br>Database -<br>CINAHL<br>Complete | 17,643  |
| S5 | TX (((pneumonia or sars*) OR (MH<br>"Pneumonia+")) AND (TX (Wuhan))) | Expanders - Apply<br>equivalent subjects<br>Search modes -<br>Boolean/Phrase | Interface -<br>EBSCOhost<br>Research<br>Databases                                                                              | 478     |

|    |                                                                                                                                                                                                                                                                                                                       |                                                                              |                                                                                                                                |        |
|----|-----------------------------------------------------------------------------------------------------------------------------------------------------------------------------------------------------------------------------------------------------------------------------------------------------------------------|------------------------------------------------------------------------------|--------------------------------------------------------------------------------------------------------------------------------|--------|
|    |                                                                                                                                                                                                                                                                                                                       |                                                                              | Search Screen<br>- Advanced<br>Search<br>Database -<br>CINAHL<br>Complete                                                      |        |
| S4 | TX ((novel or new or nouveau) N1 pandemi*)                                                                                                                                                                                                                                                                            | Expanders - Apply<br>equivalent subjects<br>Search modes -<br>Boolean/Phrase | Interface -<br>EBSCOhost<br>Research<br>Databases<br>Search Screen<br>- Advanced<br>Search<br>Database -<br>CINAHL<br>Complete | 636    |
| S3 | TX (coronavirus* or corona virus* or corona<br>virinae* or coronavirinae* or OC43 or NL63 or<br>229E or HKU1 or HCoV* or covid* or ncov* or<br>CoV or sars-cov* or sarscov* or Sars-coronavirus*<br>or Severe Acute Respiratory Syndrome<br>Coronavirus* or 2019-ncov or 2019-novel CoV or<br>SARS-like coronavirus*) | Expanders - Apply<br>equivalent subjects<br>Search modes -<br>Boolean/Phrase | Interface -<br>EBSCOhost<br>Research<br>Databases<br>Search Screen<br>- Advanced<br>Search<br>Database -<br>CINAHL<br>Complete | 15,112 |
| S2 | (MH "Coronavirus Infections+")                                                                                                                                                                                                                                                                                        | Expanders - Apply<br>equivalent subjects<br>Search modes -<br>Boolean/Phrase | Interface -<br>EBSCOhost<br>Research<br>Databases<br>Search Screen<br>- Advanced<br>Search<br>Database -<br>CINAHL<br>Complete | 3,248  |
| S1 | (MH "Coronavirus+")                                                                                                                                                                                                                                                                                                   | Expanders - Apply<br>equivalent subjects<br>Search modes -<br>Boolean/Phrase | Interface -<br>EBSCOhost<br>Research<br>Databases                                                                              | 871    |



|     |                            |                                                                              |                                                                                                                                |         |
|-----|----------------------------|------------------------------------------------------------------------------|--------------------------------------------------------------------------------------------------------------------------------|---------|
|     |                            |                                                                              | Search Screen<br>- Advanced<br>Search<br>Database -<br>CINAHL<br>Complete                                                      |         |
| S16 | (MH "Infant, Newborn+")    | Expanders - Apply<br>equivalent subjects<br>Search modes -<br>Boolean/Phrase | Interface -<br>EBSCOhost<br>Research<br>Databases<br>Search Screen<br>- Advanced<br>Search<br>Database -<br>CINAHL<br>Complete | 145,151 |
| S15 | (MH "Prenatal Diagnosis+") | Expanders - Apply<br>equivalent subjects<br>Search modes -<br>Boolean/Phrase | Interface -<br>EBSCOhost<br>Research<br>Databases<br>Search Screen<br>- Advanced<br>Search<br>Database -<br>CINAHL<br>Complete | 20,315  |
| S14 | (MH "Fetal Monitoring+")   | Expanders - Apply<br>equivalent subjects<br>Search modes -<br>Boolean/Phrase | Interface -<br>EBSCOhost<br>Research<br>Databases<br>Search Screen<br>- Advanced<br>Search<br>Database -<br>CINAHL<br>Complete | 3,261   |
| S13 | (MH "Fetus+")              | Expanders - Apply<br>equivalent subjects<br>Search modes -<br>Boolean/Phrase | Interface -<br>EBSCOhost<br>Research<br>Databases                                                                              | 28,635  |

|  |  |  |                                                                           |  |
|--|--|--|---------------------------------------------------------------------------|--|
|  |  |  | Search Screen<br>- Advanced<br>Search<br>Database -<br>CINAHL<br>Complete |  |
|--|--|--|---------------------------------------------------------------------------|--|

---

Scopus Translated Search:

```
(( ALL ( coronavirus* OR "corona virus" OR "corona viruses" OR "corona virinae" OR
coronavirinae* OR oc43 OR nl63 OR 229e OR hku1 OR hcov* OR covid* OR
ncov* OR cov OR sars-cov* OR sarscov* OR sars-coronavirus* ) OR ALL ( "Severe
Acute Respiratory Syndrome Coronavirus" OR "Severe Acute Respiratory Syndrome
Coronaviruses" OR 2019-ncov OR "SARS-like coronavirus" OR "SARS-like
coronaviruses" )) OR ( ALL ( (( novel OR new OR nouveau ) W/2 pandemi* )) ) OR
( ALL ( ( ( pneumonia OR sars* ) AND wuhan ) )) ) AND ( ( TITLE-ABS-KEY ( pregnan*
OR gestation* OR parturition OR neonatal* OR "neo natal" OR neonate* OR
antenatal* OR "ante natal" OR prenatal* OR "pre natal" OR puerper* OR postnatal*
OR "post natal" OR postpartum OR "post partum" OR peripartum OR "peri partum"
OR intrapartum OR "intra partum" OR prepregnancy OR "pre pregnancy" OR
preconception* OR "pre conception" OR periconception* OR "peri conception" OR
preterm OR premature OR labo?r OR eclamp* OR preeclamp* OR "pre eclampsia"
OR amniocentes* OR chorion* AND vill* OR breastfe* OR "breast fed" OR "breast
feeding" OR lactation* OR cesarean OR caesarean OR cesarian OR caesarian
OR cesarien OR caesarien OR newborn* OR "new born" OR "new borns" OR
tocoly* OR fetal OR foetal OR fetus OR foetus OR miscarriage* OR obstetric* ))
OR ( TITLE-ABS-KEY ( ( vertical OR fetomaternal OR foetomaternal OR maternal-
fetal OR "Maternal Fetal" OR maternal-foetal OR "Maternal Foetal" OR mother-to-
child OR "Mother to child" ) W/2 ( transmission* )) ) ) AND ( LIMIT-TO ( PUBYEAR ,
2020 ) OR LIMIT-TO ( PUBYEAR , 2019 ) )
```

**282 Document Results**

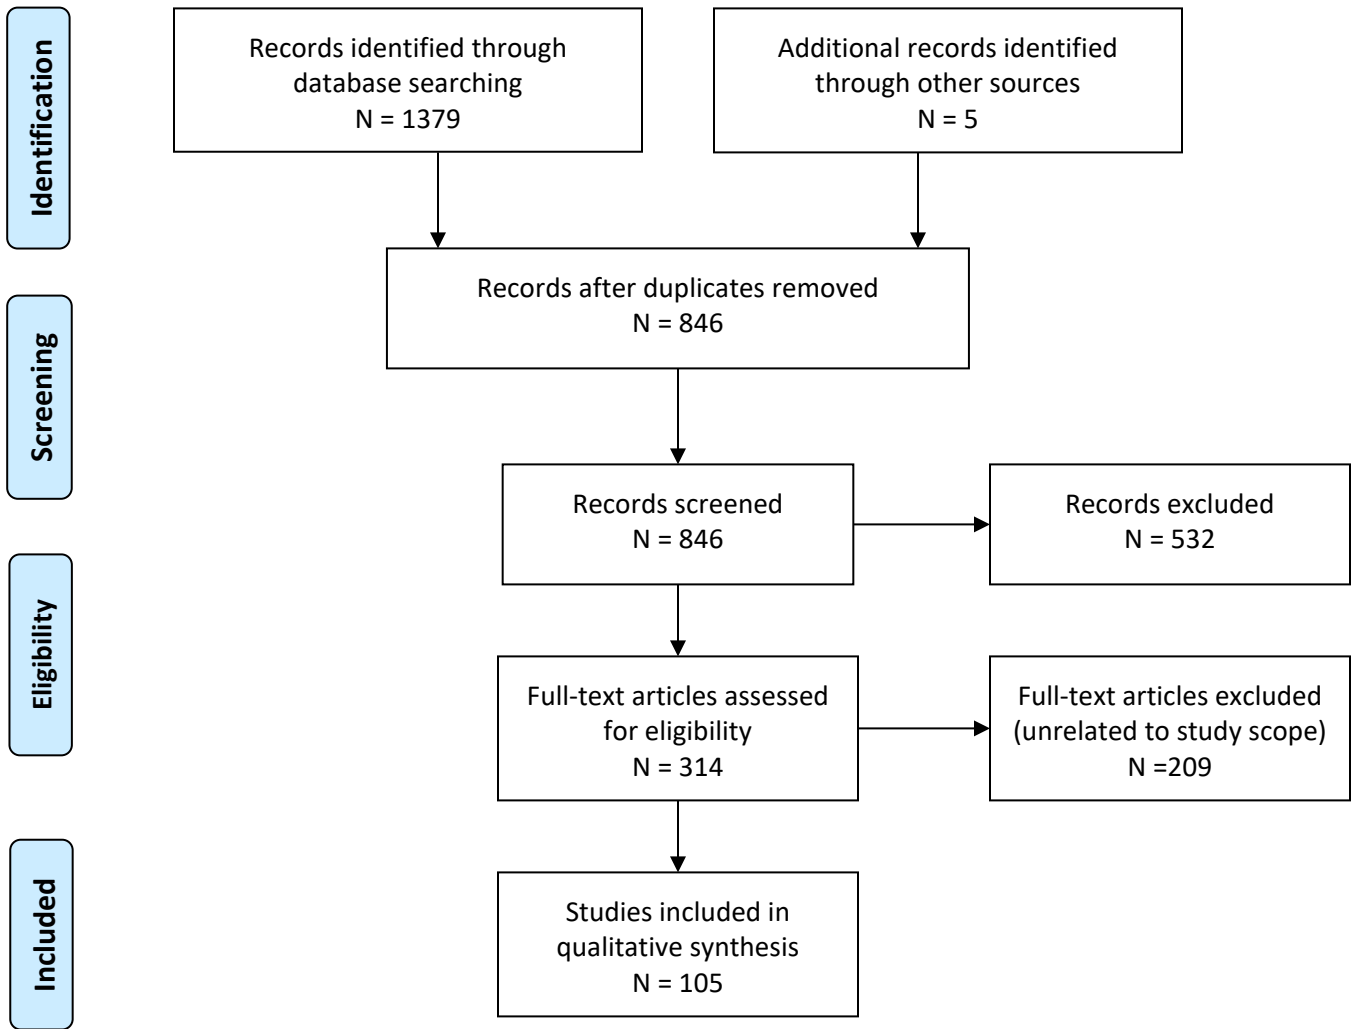

# Ambulatory Visit of a Confirmed or Suspected Case of COVID-19

Give written instructions to patient : 1. Meeting point. 2 How to don mask

Patient to follow Public Health guidelines for travel to clinic

On arrival, Patient calls Ambulatory Clinical Co-Ordinator. *If no answer, call Clinical Director*  
Patient waits at meeting point until greeted by staff member  
Clinical co-ordinator/ Clinical director will notify clerk at relevant clinic to check patient in

Notify healthcare provider of patients arrival. Healthcare provider to don droplet/contact PPE  
Proceed to meeting point to greet patient and give them a mask (if they do not already have one)

Patient to don mask & perform hand hygiene, before entering elevator/ clinic area

Enter clinic area through designated door to avoid unnecessary staff/patient contact

Take patient to ultrasound room or consult room as required  
Place Droplet Contact sign on door. Do NOT bring paper chart into room

Give patient their follow-up appointment(s) before leaving room

After the appointment is completed: 1. Doff all PPE inside the room, *except* mask. 2. Escort patient to elevators and advise them to immediately exit building 3. Put "do not enter" sign on room door

Page service assistant to complete Terminal Clean x 2 after patient leaves room/washroom

If washroom is needed, escort patient to designated washroom.  
Washroom is locked with a sign  
"STOP, Do Not Enter".  
After use, page service assistant: to complete terminal clean x2

## Staff check list:

- Ensure Appointment room is stocked
- Ensure PPE cart is stocked and placed outside appointment room
- Review chart to determine if any lab requisitions or specimens need completion

## COVID-19 Antenatal Care Clinic

### Background

- During the months of April, May and June 2020 we anticipate increased volumes of COVID-19 positive pregnant patients who are outpatients requiring antenatal visits and fetal ultrasound
- COVID-19 poses increased pregnancy risk based on emerging data on pregnancy outcome, thus increased fetal surveillance may be indicated (fetal well being, fetal growth, possibly maternal cervical length)
- As the low- and high-risk pregnancy clinics are relatively busy areas (clinical activity has been ramped down), having multiple COVID positive patients in the environment may pose risk to other patients and care providers. Having separate location + dedicated team may reduce overall exposure
- Although difficult to predict exactly how many patients will need this service, it would be reasonable to implement the plan if our COVID positive population reaches 5-10 patients per week.

#### **RN and MD staffing clinic to don appropriate PPE for Clinic and present to the 2<sup>nd</sup> floor**

- PPE to be brought over with them from OPG
- BP cuff to be provided by WCH
- No paper charts; no Doptone transported over

#### **Antenatal patient known COVID-positive status requires antenatal visit and/or fetal ultrasound**

#### **Patient presents to side entrance of WCH and takes dedicated elevator to 2<sup>nd</sup> floor Waiting area**

- Greeted by WCH Navigator
- Performs hand hygiene
- Puts on mask
- Patient directed to the Assessment Room or US Room

#### **RN to perform assessment**

- Weight, blood pressure
- Record in Electronic Medical Records
- Guide patient to door
- Navigator guides patient to US room

**Room cleaning to commence**

#### **MD to perform fetal assessment**

- US as appropriate for gestational weeks and pregnancy complications
- Complete assessment and document in Electronic Medical Records
- Patient directed to waiting area

**Room cleaning to commence)**

Patient visit complete

Navigator directs patient to perform hand hygiene and guides patient to the exit

RN/MD to email SPP admin patient list with orders for each patient and to indicate timing of next visit and/or US

## Supplementary Data 7

### Low-Risk Inclusion Criteria for Early Discharge, less than 24 hours after birth

24-36 Hour post birth follow-up must be in place for newborn assessment/ screening tests.

| Mother                                                                                                                                                                                                                                                                                                                                                                                                                                                                                                                                                                                                                                                                                                                                                                                                                                                                                            | Newborn                                                                                                                                                                                                                                                                                                                                                                                                                                                                                                                                                                                                                                                                                                                                                                                                                                                                                                                                                |
|---------------------------------------------------------------------------------------------------------------------------------------------------------------------------------------------------------------------------------------------------------------------------------------------------------------------------------------------------------------------------------------------------------------------------------------------------------------------------------------------------------------------------------------------------------------------------------------------------------------------------------------------------------------------------------------------------------------------------------------------------------------------------------------------------------------------------------------------------------------------------------------------------|--------------------------------------------------------------------------------------------------------------------------------------------------------------------------------------------------------------------------------------------------------------------------------------------------------------------------------------------------------------------------------------------------------------------------------------------------------------------------------------------------------------------------------------------------------------------------------------------------------------------------------------------------------------------------------------------------------------------------------------------------------------------------------------------------------------------------------------------------------------------------------------------------------------------------------------------------------|
| <ul style="list-style-type: none"> <li>• Willing to receive follow-up care at designated location</li> <li>• Vaginal delivery</li> <li>• Has voided independently</li> <li>• If GDM: protocol complete</li> <li>• Perineal repair: 2nd degree or less</li> <li>• Vital signs stable with normal postpartum assessment (lochia, fundus)</li> <li>• Stable mood with psychosocial support and no concerns with home environment</li> <li>• No pre-existing hypertension, PPH, gestational hypertension, chorioamnionitis, intrapartum complication or other medical concern(s)</li> <li>• Required MMR, RhoGam and medications have been administered</li> <li>• Mother/guardian demonstrates satisfactory knowledge and comprehension for self-care and newborn care including how to access care in an emergency</li> <li>• MRP (or delegate) has written an order for early discharge</li> </ul> | <ul style="list-style-type: none"> <li>• Primary health care provider in the community has been established</li> <li>• 37 weeks' gestation or greater</li> <li>• If mother GBS positive, adequate intrapartum prophylaxis provided</li> <li>• If assisted vaginal delivery: discharge after 12hrs</li> <li>• APGAR at 5 minutes: 7 or higher</li> <li>• Newborn exam completed by MRP</li> <li>• DAT negative</li> <li>• Hypoglycemia protocol complete is indicated</li> <li>• No SGA</li> <li>• No risk factors for sepsis</li> <li>• If breastfeeding, one successful latch has been observed. If bottle feeding, skill with bottle feeding has been observed.</li> <li>• Vital signs are stable</li> <li>• Newborn standards of care have been met (Vitamin K, Erythromycin prophylaxis if indicated)</li> <li>• Required immunizations (e.g. Hepatitis) have been administered</li> <li>• MRP has written an order for early discharge</li> </ul> |
